# Supplementary material
Source: PubMed Central journal article supplement (PMC10330881)

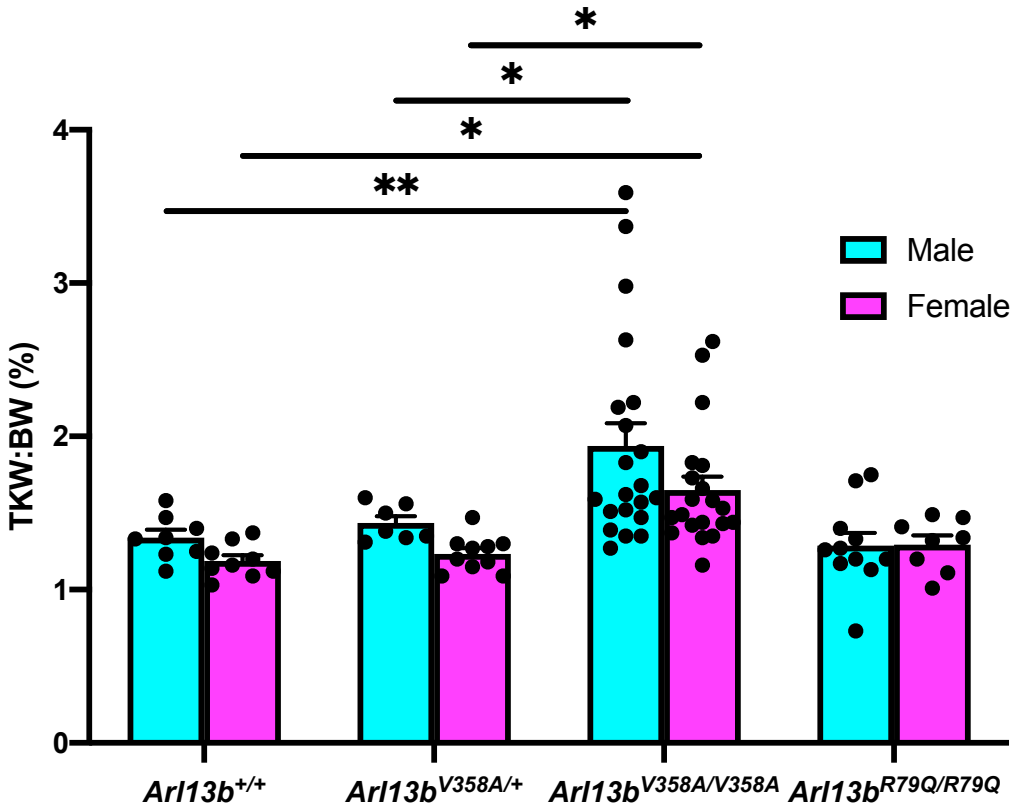

Supplement: NIHMS1906485-supplement-1.pdf [file NIHMS1906485-supplement-1.pdf]
